# Supplementary material for: Development of a naproxen and gaultheria oil based topical nanoemulsion for the amelioration of osteoarthritis
Source: Royal Society of Chemistry journal article supplement (doi:10.1039/d4pm00059e), 2024-01-01

**Table S1- Solubility of Na in different surfactant & Co-surfactant**

| <b>S.no</b> | <b>Surfactant/Co-Surfactants</b> | <b>HLB</b>  | <b>Drug solubility (mg/ml)</b> |
|-------------|----------------------------------|-------------|--------------------------------|
| <b>1</b>    | <b>Tween 20</b>                  | <b>16.7</b> | <b>6.2± 0.315</b>              |
| <b>2</b>    | <b>Tween 40</b>                  | <b>15.6</b> | <b>6.9± 0.164</b>              |
| <b>3</b>    | <b>Tween 80</b>                  | <b>15</b>   | <b>10.2± 0.218</b>             |
| <b>4</b>    | <b>PEG400</b>                    | <b>11.4</b> | <b>40.5± 0.182</b>             |

|  |  |  |
|--|--|--|
|  |  |  |
|  |  |  |
|  |  |  |
|  |  |  |
|  |  |  |

**Table S2 - HLB value of selected surfactants**

| <b>S. No.</b> | <b>Surfactant/ Co- Surfactants</b> | <b>HLB</b> |
|---------------|------------------------------------|------------|
| 1             | Tween 20                           | 16.7       |
| 2             | Tween 40                           | 15.6       |
| 3             | Tween 80                           | 15         |
| 4             | PEG400                             | 11.4       |

**Table S3: Summary of regression analysis findings for responses R1, R2 and R3 for quadratic equation fitting**

| Responses          | R <sup>2</sup> | Adjusted R <sup>2</sup> | Predicted R <sup>2</sup> | S.D.   | C.V.%  | Adequate precision |
|--------------------|----------------|-------------------------|--------------------------|--------|--------|--------------------|
| R1 = particle size | 0.9877         | 0.9657                  | 0.8983                   | 9.37   | 5.04   | 22.2071            |
| R2 = PDI           | 0.9844         | 0.9564                  | 0.7783                   | 0.0197 | 7.69   | 19.5793            |
| R3 = Zeta          | 0.9732         | 0.9250                  | 0.9359                   | 0.2202 | 0.8748 | 14.9459            |

**Figure S1– Observation of Stress Stability Studies of different formulations**

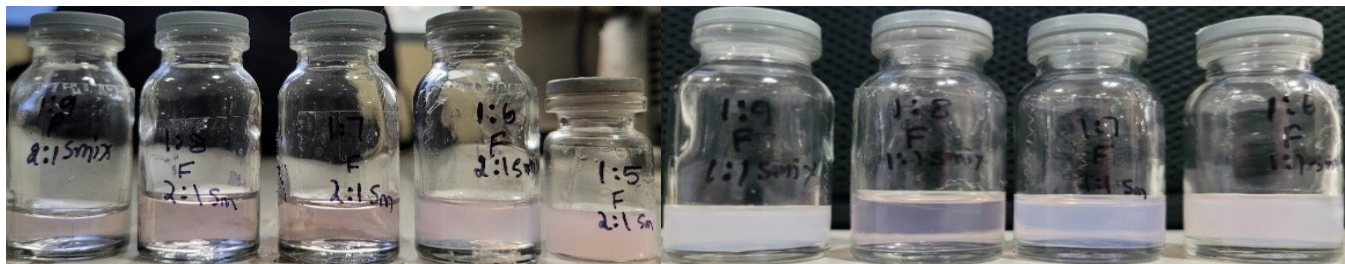

Supplement: d4pm00059e1.pdf [file d4pm00059e1.pdf]
